# Supplementary material for: The Dimensionality, Consistency, and Structural Validity of an Instrument Used to Measure Obesogenic Attitudes in Parents from Southern Spain (The PRELSA Scale)
Source: MDPI journal article supplement (doi:10.3390/nu16081135), 2024-04-11
Supplement: s1 [file s1]

# The Dimensionality, Consistency, and Structural Validity of an Instrument Used to Measure Obesogenic Attitudes in Parents from Southern Spain (The PRELSA Scale)

## Supplementary Material:

Table S1: Demographic Characteristics in Field Test

| VARIABLE                | CATEGORIES              | N    | %            |
|-------------------------|-------------------------|------|--------------|
| SEX                     | Women                   | 738  | 93.3         |
|                         | Men                     | 53   | 6.7          |
| MARITAL STATUS          | Married                 | 536  | 67.8         |
|                         | Divorced                | 18   | 2.2          |
|                         | Domestic Partner        | 92   | 11.6         |
|                         | Single                  | 7    | 0.8          |
| RELATION WITH THE CHILD | Parents                 | 784  | 99.1         |
|                         | Family and Caregiver    | 4    | 0.5          |
|                         | No Family and Caregiver | 3    | 0.4          |
| EDUCATION LEVEL         | Primary                 | 34   | 4.3          |
|                         | Secondary               | 59   | 7.4          |
|                         | Bachelor                | 48   | 6.1          |
|                         | Professional Training   | 165  | 20.8         |
|                         | University Degree       | 334  | 42.2         |
|                         | Master                  | 128  | 16.2         |
|                         | PhD                     | 23   | 2.9          |
| JOB SITUATION           | Full Time Job           | 403  | 50.9         |
|                         | Partial Time Job        | 191  | 24.1         |
|                         | Unemployed              | 186  | 23.5         |
|                         | Other situation         | 11   | 1.4          |
| INCOME                  | <1000€                  | 58   | 7.3          |
|                         | 1000€-2000€             | 301  | 38.1         |
|                         | 2000€-4000€             | 346  | 43.7         |
|                         | More than 4000 €        | 80   | 10.1         |
|                         | Mean                    | SD   | IC           |
| AGE                     | 37.95                   | 5.17 | (27.8, 48.1) |
| FAMILY MEMBERS          | 3.68                    | 0.81 | (2.1, 5.3)   |
| CHILDREN AGE            | 3.79                    | 1.41 | (1.0, 6.5)   |
| IMC PARENTS             | 25.53                   | 5.45 | (14.8, 36.2) |
| Z-IMC/AGE CHILDREN      | 0.18                    | 1.40 | (-2.6, 2.9)  |

Table S2: Results of the chosen EFA Model (48 Items - 14 Dimensions)

|      | F1     | F2     | F3    | F4     | F5     | F6     | F7     | F8     | F9     | F10    | F11    | F12   | F13    | F14    | COMM  |
|------|--------|--------|-------|--------|--------|--------|--------|--------|--------|--------|--------|-------|--------|--------|-------|
| CWP2 | 0.872  | -0.077 | 0.069 | 0.02   | 0.112  | -0.093 | 0.028  | -0.137 | 0.069  | -0.062 | 0.138  | 0.007 | -0.074 | 0.007  | 0.753 |
| CWP4 | 0.636  | -0.037 | 0.029 | -0.09  | -0.005 | 0.155  | -0.007 | 0.085  | 0.021  | 0.018  | -0.035 | 0.124 | -0.032 | 0.023  | 0.391 |
| RES2 | -0.083 | -0.125 | 0.238 | 0.386  | -0.039 | 0.006  | -0.085 | 0.042  | -0.104 | 0.001  | 0.21   | 0.254 | -0.196 | 0.026  | 0.54  |
| RES3 | -0.049 | 0.634  | 0.059 | -0.034 | -0.16  | -0.1   | 0.044  | 0.049  | 0.142  | -0.058 | -0.035 | 0.047 | 0.009  | -0.043 | 0.57  |

|      |        |        |        |        |        |        |        |        |        |        |        |        |        |        |       |
|------|--------|--------|--------|--------|--------|--------|--------|--------|--------|--------|--------|--------|--------|--------|-------|
| RES4 | -0.025 | 0.93   | -0.022 | -0.049 | 0.032  | -0.006 | -0.022 | -0.067 | -0.066 | -0.087 | 0.15   | -0.041 | -0.091 | -0.017 | 0.832 |
| PRE1 | 0.046  | 0.061  | 0.629  | -0.105 | -0.026 | 0.012  | 0.252  | 0      | -0.042 | 0.028  | -0.112 | -0.087 | -0.084 | -0.04  | 0.586 |
| PRE2 | 0.014  | 0.127  | 0.573  | -0.039 | -0.113 | -0.048 | 0.096  | -0.095 | 0.002  | 0.074  | -0.034 | 0.191  | 0.038  | -0.113 | 0.53  |
| PRE3 | -0.008 | -0.025 | 0.731  | -0.121 | 0.059  | -0.065 | -0.061 | -0.024 | -0.031 | 0.1    | -0.111 | -0.047 | 0.001  | 0.016  | 0.658 |
| PRE4 | 0.038  | -0.008 | 0.745  | 0.088  | -0.041 | -0.04  | -0.029 | -0.16  | 0.099  | -0.088 | 0.094  | -0.007 | 0.073  | -0.014 | 0.6   |
| VQD1 | 0      | -0.202 | 0.138  | 0.566  | -0.009 | -0.021 | -0.247 | 0.059  | -0.116 | 0.051  | -0.135 | 0.008  | -0.042 | 0.156  | 0.524 |
| VQD2 | 0.029  | 0.145  | 0.023  | -0.38  | -0.062 | 0.129  | 0.012  | 0.011  | 0.091  | 0.156  | -0.291 | -0.059 | 0.08   | -0.091 | 0.458 |
| VQD3 | -0.031 | -0.038 | -0.039 | 0.962  | -0.093 | 0.011  | 0.044  | -0.092 | 0.076  | 0.042  | -0.135 | -0.084 | 0.025  | -0.11  | 0.641 |
| VQD4 | -0.026 | 0.108  | 0.098  | 0.547  | -0.068 | 0.078  | 0.013  | 0.102  | -0.117 | -0.196 | 0.26   | 0.026  | -0.106 | -0.001 | 0.583 |
| SME1 | 0.045  | 0.019  | -0.019 | -0.027 | 0.959  | 0.042  | 0.091  | 0.078  | 0.017  | 0.047  | -0.171 | 0.071  | 0.131  | -0.081 | 0.886 |
| SME2 | 0.049  | -0.041 | 0.122  | -0.009 | -0.087 | 0.016  | -0.099 | 0.164  | 0.909  | -0.071 | 0.094  | 0.019  | -0.17  | 0.075  | 0.794 |
| SME3 | 0.04   | 0.114  | 0.034  | 0.159  | -0.771 | -0.01  | 0.106  | -0.073 | 0.058  | 0.05   | -0.065 | -0.032 | -0.075 | 0.141  | 0.723 |
| SME4 | -0.02  | 0.096  | 0.067  | 0.146  | 0.312  | -0.073 | -0.086 | -0.034 | 0.739  | -0.089 | 0.212  | -0.007 | -0.075 | 0.037  | 0.607 |
| SME5 | 0.081  | 0.055  | 0.042  | 0.021  | 0.722  | 0.161  | -0.113 | 0.045  | 0.013  | 0.042  | -0.101 | 0.041  | -0.016 | 0.066  | 0.64  |
| SMT1 | 0.023  | -0.063 | -0.111 | 0.084  | 0.108  | 0.699  | 0.076  | -0.117 | 0.015  | 0.028  | 0.16   | -0.094 | -0.149 | 0.122  | 0.685 |
| SMT2 | -0.05  | 0.049  | 0.021  | -0.118 | 0.044  | 0.69   | 0.076  | -0.071 | -0.063 | -0.043 | -0.086 | 0.153  | 0.059  | -0.026 | 0.503 |
| SMT3 | 0.061  | 0.142  | 0.131  | 0.054  | -0.018 | -0.334 | 0.054  | 0.08   | 0.126  | -0.043 | -0.178 | 0.1    | 0.281  | 0.155  | 0.384 |
| SMT4 | -0.011 | 0.017  | 0.358  | 0.026  | 0.26   | 0.189  | 0.044  | 0.13   | 0.002  | -0.002 | -0.296 | -0.264 | 0.04   | 0.091  | 0.336 |
| FME1 | 0.024  | 0.075  | 0.041  | 0.065  | -0.012 | 0.09   | 0.799  | 0.047  | -0.095 | -0.009 | 0.109  | 0.018  | -0.011 | -0.008 | 0.717 |
| FME2 | 0.11   | -0.066 | -0.045 | 0.064  | -0.02  | 0.002  | 0.509  | 0.252  | -0.071 | -0.088 | -0.156 | 0.089  | -0.033 | 0.25   | 0.479 |
| FME3 | 0.048  | -0.068 | -0.131 | 0.726  | 0.001  | -0.045 | 0.18   | -0.121 | 0.104  | 0.112  | 0.036  | 0.054  | 0.11   | -0.085 | 0.665 |
| SPA1 | 0.033  | -0.084 | -0.065 | -0.119 | 0.002  | -0.067 | 0.077  | 1.067  | 0.094  | -0.105 | 0.147  | -0.079 | -0.113 | 0.056  | 0.932 |
| SPA2 | -0.094 | -0.045 | -0.077 | -0.044 | 0.184  | -0.084 | 0.073  | 0.999  | 0.055  | 0.02   | -0.102 | 0.023  | -0.066 | -0.001 | 0.776 |
| SPA3 | 0.07   | -0.143 | 0.181  | 0.052  | -0.126 | 0.155  | -0.127 | 0.432  | -0.021 | 0.085  | 0.296  | -0.035 | 0.154  | -0.341 | 0.831 |
| SPA4 | 0.062  | -0.061 | 0.014  | 0.107  | -0.037 | 0.061  | -0.126 | 0.05   | -0.058 | 0.807  | -0.111 | 0.015  | 0.023  | 0.069  | 0.67  |
| SPA5 | 0.058  | 0.033  | 0      | 0.09   | -0.058 | 0.049  | 0.004  | 0.204  | -0.061 | 0.087  | 0.384  | 0.077  | 0.198  | -0.228 | 0.722 |
| SPA5 | 0.103  | 0.052  | -0.145 | -0.095 | -0.103 | -0.034 | -0.041 | 0.038  | -0.08  | 0.064  | 0.716  | -0.094 | -0.04  | -0.012 | 0.516 |
| LSA2 | 0.059  | 0.084  | -0.019 | 0.017  | -0.073 | 0.131  | 0.006  | 0.064  | -0.04  | 0.106  | 0.45   | 0.043  | 0.113  | -0.071 | 0.496 |
| LSA3 | 0.021  | 0.08   | 0      | 0.017  | 0.029  | -0.027 | -0.113 | 0.23   | -0.018 | 0.032  | 0.542  | 0.019  | 0.039  | -0.032 | 0.581 |
| LSA4 | -0.041 | 0.085  | -0.005 | 0.055  | -0.032 | 0.028  | 0.151  | -0.108 | 0.061  | -0.024 | 0.57   | -0.028 | 0.154  | -0.103 | 0.381 |
| CPA1 | -0.026 | -0.229 | 0.007  | -0.122 | -0.071 | 0.13   | 0.085  | -0.129 | 0.19   | -0.132 | 0.717  | 0.031  | 0.169  | -0.025 | 0.568 |
| CPA2 | -0.09  | -0.078 | 0.037  | -0.002 | 0.136  | -0.112 | 0.063  | -0.15  | -0.039 | 0.813  | 0.253  | 0.058  | -0.057 | 0.104  | 0.774 |
| CPA3 | 0.006  | -0.021 | 0.042  | -0.081 | 0.086  | -0.127 | 0.141  | 0.086  | 0.083  | 0.13   | 0.728  | 0.021  | -0.074 | -0.067 | 0.62  |
| CPA4 | -0.038 | 0.162  | 0.022  | 0.053  | -0.042 | 0.058  | -0.027 | -0.016 | -0.074 | -0.011 | 0.807  | -0.046 | -0.022 | 0.142  | 0.709 |
| SBI2 | 0.002  | 0.5    | 0.018  | 0.028  | 0.058  | 0.146  | 0.052  | -0.064 | 0.128  | 0.136  | -0.269 | -0.024 | 0.058  | -0.088 | 0.497 |
| SV1  | -0.04  | 0.114  | -0.031 | 0.136  | 0.068  | -0.092 | -0.092 | 0.16   | -0.05  | -0.133 | -0.098 | 0.526  | 0.269  | -0.058 | 0.545 |
| SV3  | 0.043  | 0.051  | -0.013 | -0.081 | 0.069  | 0.039  | 0.031  | -0.091 | -0.069 | 0.058  | -0.038 | 1.025  | -0.088 | 0.083  | 0.87  |
| SV4  | 0.023  | 0.359  | -0.021 | 0.025  | -0.13  | 0.151  | -0.092 | -0.03  | 0.353  | 0.125  | -0.192 | -0.032 | 0.167  | -0.031 | 0.448 |
| SV5  | -0.004 | 0.031  | -0.054 | 0.077  | -0.05  | -0.033 | -0.054 | 0.064  | 0.95   | 0.024  | -0.076 | -0.072 | 0.066  | 0.095  | 0.841 |
| IMS1 | -0.072 | -0.03  | 0.046  | 0.13   | 0.085  | 0.025  | -0.075 | -0.08  | 0.111  | 0.014  | 0.078  | 0.103  | 0.564  | 0.119  | 0.462 |
| IMS4 | -0.026 | -0.056 | 0.064  | -0.039 | 0.058  | -0.054 | 0.02   | -0.086 | -0.064 | 0.041  | 0.02   | -0.062 | 0.929  | 0.003  | 0.763 |
| IMS5 | 0.004  | -0.009 | -0.003 | 0.041  | 0.122  | -0.053 | -0.083 | -0.055 | -0.077 | -0.125 | 0.226  | -0.041 | 0.736  | 0.164  | 0.771 |
| IRS1 | -0.062 | -0.051 | 0.052  | 0.028  | 0.013  | -0.087 | -0.042 | 0.078  | 0.108  | 0.081  | 0.135  | 0.015  | -0.03  | 0.382  | 0.227 |
| IRS3 | 0.029  | -0.078 | -0.016 | -0.096 | -0.092 | 0.07   | 0.033  | 0.061  | 0.085  | 0.098  | -0.009 | 0.061  | 0.108  | 0.713  | 0.588 |

|     |                              |        |        |        |        |        |       |        |        |       |       |       |       |   |  |
|-----|------------------------------|--------|--------|--------|--------|--------|-------|--------|--------|-------|-------|-------|-------|---|--|
|     | CORRELATIONS BETWEEN FACTORS |        |        |        |        |        |       |        |        |       |       |       |       |   |  |
| F1  | 1                            |        |        |        |        |        |       |        |        |       |       |       |       |   |  |
| F2  | 0.134                        | 1      |        |        |        |        |       |        |        |       |       |       |       |   |  |
| F3  | 0.085                        | 0.408  | 1      |        |        |        |       |        |        |       |       |       |       |   |  |
| F4  | 0.117                        | -0.227 | -0.127 | 1      |        |        |       |        |        |       |       |       |       |   |  |
| F5  | -0.172                       | 0.009  | -0.351 | 0.051  | 1      |        |       |        |        |       |       |       |       |   |  |
| F6  | -0.24                        | -0.045 | -0.322 | 0.232  | 0.457  | 1      |       |        |        |       |       |       |       |   |  |
| F7  | -0.012                       | -0.082 | -0.039 | 0.121  | -0.166 | -0.116 | 1     |        |        |       |       |       |       |   |  |
| F8  | 0.093                        | -0.1   | -0.003 | 0.544  | -0.1   | 0.146  | 0.079 | 1      |        |       |       |       |       |   |  |
| F9  | -0.087                       | 0.393  | 0.257  | -0.499 | 0.006  | -0.04  | 0.04  | -0.315 | 1      |       |       |       |       |   |  |
| F10 | 0.146                        | 0.197  | 0.179  | 0.174  | -0.078 | -0.032 | 0.135 | 0.483  | 0.055  | 1     |       |       |       |   |  |
| F11 | 0.033                        | -0.176 | -0.168 | 0.54   | 0.009  | 0.249  | 0.146 | 0.704  | -0.316 | 0.468 | 1     |       |       |   |  |
| F12 | 0.031                        | -0.291 | -0.081 | 0.487  | -0.157 | 0.12   | 0.168 | 0.492  | -0.335 | 0.131 | 0.52  | 1     |       |   |  |
| F13 | 0.097                        | -0.154 | -0.002 | 0.376  | -0.242 | 0.144  | 0.253 | 0.552  | -0.243 | 0.167 | 0.565 | 0.454 | 1     |   |  |
| F14 | 0.04                         | 0.055  | 0.141  | 0.244  | -0.17  | -0.076 | 0.063 | 0.16   | -0.219 | -0.06 | 0.159 | 0.176 | 0.276 | 1 |  |

## ***Preschool Eating, Lifestyle, and Sleeping Attitudes Scale (PRELSA Scale)***

### ***English Version (60 items and 13 dimensions)***

#### **Part 1: Feeding Practices and Attitudes**

##### **Child's Weight Concern and Perception (CWC)**

- **CWC1:** Do you think your child currently presents...? *Answers: 1 = very low weight, 2 = low weight, 3 = normal weight, 4 = overweight, 5 = obesity*

*Answers: 1 = not worried at all, 2 = a little worried, 3 = worried, 4 = quite worried, 5 = very worried*

- **CWC2:** Are you worried that your child eats too much?
- **CWC3:** Are you worried that your child is overweight during childhood?
- **CWC4:** Are you concerned that potential excess weight in your child during this preschool stage could be a health problem in the short/medium term?

##### **Restrictions**

*Answers: 1 = disagree, 2 = slightly disagree, 3 = indifferent/don't care, 4 = slightly agree, 5 = agree, 9 = NS/NC*

- **RES1:** I consider it important to control my child's intake of sweets (cookies, cakes, candies).
- **RES2:** I consider it important to control my child's intake of high-calorie foods (like snacks, pizzas, and/or hamburgers).
- **RES3:** I consider it appropriate to use some type of food as a reward when behaving well.
- **RES4:** I consider it appropriate to use food to calm my child down.

##### **Pressure to eat**

*Answers: 1 = disagree, 2 = slightly disagree, 3 = indifferent/don't care, 4 = slightly agree, 5 = agree, 9 = NS/NC*

- **PRE1:** I believe my child should always finish all the food on the plate.
- **PRE2:** I try to make sure my child eats what I consider necessary.
- **PRE3:** I try to make my child eat regardless of whether they say they are not hungry.
- **PRE4:** I try to control my child's food intake so that they don't eat less than they should.

### **Variety and quality of the diet**

*Answers: 1 = disagree, 2 = slightly disagree, 3 = indifferent/don't care, 4 = slightly agree, 5 = agree, 9 = NS/NC*

- **VQD1:** I consider it appropriate to offer water as the only drink for my child at main meals.
- **VQD2:** I consider it appropriate to offer my child pre-cooked and/or industrially processed foods in their regular diet.
- **VQD3:** I consider it necessary to always offer salads and/or vegetables in my child's meals.
- **VQD4:** I consider it necessary for my child to eat fruits every day.
- **VQD5:** I consider it necessary for my child to eat enough, even if the diet is sometimes not varied.

### **Structured Meal Environment**

*Answers: 1 = disagree, 2 = slightly disagree, 3 = indifferent/don't care, 4 = slightly agree, 5 = agree, 9 = NS/NC*

- **SME1:** I consider it appropriate for my child to get up or move around during meals.
- **SME2:** I consider it appropriate for my child to eat entertained with screens (TV, computer, mobiles, and/or tablets).
- **SME3:** I consider it appropriate for my child to remain seated throughout mealtime.
- **SME4:** I consider it appropriate for my child to eat entertained with some game.
- **SME5:** I consider it appropriate for my child to eat if they are not seated at the table.

### **Structured Mealtime**

*Answers: 1 = disagree, 2 = slightly disagree, 3 = indifferent/don't care, 4 = slightly agree, 5 = agree, 9 = NS/NC*

- **SMT1:** I consider it appropriate for my child to decide when they want to eat.
- **SMT2:** I consider it appropriate for my child to sometimes eat between meals.
- **SMT3:** I am the one who should organize my child's meal schedules.
- **SMT4:** I consider it appropriate for my child to eat quickly.

### **Family Meal Environment**

*Answers: 1 = disagree, 2 = slightly disagree, 3 = indifferent/don't care, 4 = slightly agree, 5 = agree, 9 = NS/NC*

- **FME1:** I consider it necessary for my child to eat main meals with the rest of the family.
- **FME2:** I consider it necessary for my child to eat the same food as the rest of the family.
- **FME3:** I consider it necessary for family meals to always have dishes with salads and/or vegetables on the table.

Total of 29 items

## **Part 2: Physical Activity, Sedentarism, and Screen Time Attitudes**

### **Stimulate Physical Activity**

*Answers: 1 = disagree, 2 = slightly disagree, 3 = indifferent/don't care, 4 = slightly agree, 5 = agree, 9 = NS/NC*

- **SPA1:** I consider my child's physical activity as important for their development as their nutrition.
- **SPA2:** I consider my child's physical activity as important for their development as their studies.
- **SPA3:** I try to teach my child that being active is good for their health.
- **SPA4:** I consider it appropriate to motivate my child to engage in physical activities over other types of activities.
- **SPA5:** I consider it important to introduce my child to various options for physical activity and active play.
- **SPA6:** I believe my child can learn healthy habits of physical activity through my example.

### **Logistic Support for Activity (environment, materials...)**

*Answers: 1 = disagree, 2 = slightly disagree, 3 = indifferent/don't care, 4 = slightly agree, 5 = agree, 9 = NS/NC*

- **LSA1:** I consider it necessary to take my child to places that have areas or parks for children.
- **LSA2:** I consider it necessary to provide my child with toys and/or games that encourage physical activity.
- **LSA3:** I consider it necessary to organize my child's routines so that there is frequently space for physical activity.
- **LSA4:** One of my priorities when thinking about where to live is that my child has spaces to play indoors or outdoors.

### **Co-Participation in Activity**

*Answers: 1 = disagree, 2 = slightly disagree, 3 = indifferent/don't care, 4 = slightly agree, 5 = agree, 9 = NS/NC*

- **CPA1:** I consider it important to ask my child what they like when it comes to playing.
- **CPA2:** I consider it appropriate to play active games and/or sports with my child over other activities.
- **CPA3:** I believe it's necessary to have time for physical activity with my child.
- **CPA4:** I believe family habits of physical activity can influence my child's healthy lifestyle throughout their life.

### **Sedentary Behavior Issues**

*Answers: 1 = disagree, 2 = slightly disagree, 3 = indifferent/don't care, 4 = slightly agree, 5 = agree, 9 = NS/NC*

- **SBI1:** I consider it appropriate to habitually keep my child distracted through activities that don't require physical effort.
- **SBI2:** I consider it appropriate to offer rewards to my child to keep them still.

### **Screen Viewing (mobiles, tablets, computers, television)**

*Answers: 1 = disagree, 2 = slightly disagree, 3 = indifferent/don't care, 4 = slightly agree, 5 = agree, 9 = NS/NC*

- **SV1:** I consider it appropriate to limit my child's screen viewing (TV, computer, mobiles, and/or tablets).
- **SV2:** I consider it appropriate for screen viewing to be part of my child's regular routine.
- **SV3:** I consider it appropriate to limit my screen time when I'm with my child/children.
- **SV4:** I consider it appropriate to occasionally use screens to calm and/or reward my child.
- **SV5:** I consider it appropriate to use screens during meals.

Total of 21 items

## **Part 3: Sleeping Attitudes**

### **Impact and Modification of Sleep**

*Answers: 1 = disagree, 2 = slightly disagree, 3 = indifferent/don't care, 4 = slightly agree, 5 = agree, 9 = NS/NC*

- **IMS1:** I believe sleep routines affect other areas of my child's mental and physical development.
- **IMS2:** I believe sleep problems can be improved by changing children's habits.
- **IMS3:** I believe sleep problems in my child can cause obesity problems in the future.
- **IMS4:** I believe my child's lack of sleep can encourage them to eat more during the day.
- **IMS5:** I believe family routines can influence proper sleep patterns for children.

### **Interactions Regarding Sleep**

*Answers: 1 = disagree, 2 = slightly disagree, 3 = indifferent/don't care, 4 = slightly agree, 5 = agree, 9 = NS/NC*

- **IRS1:** I consider it appropriate for my child to have the same sleep habits every day of the week.
- **IRS2:** I consider it appropriate for my child to make decisions about their sleep routines and schedules.
- **IRS3:** I consider it appropriate for my child to sleep most nights in the same place.
- **IRS4:** I consider it appropriate for my child to frequently come to my bed if they wake up at night.
- **IRS5:** I consider it appropriate for my child to use screens (TV, computer, mobiles, and/or tablets) to fall asleep.

Total of 10 items

### ***Preschool Eating, Lifestyle, and Sleeping Attitudes Scale (PRELSA Scale)***

#### ***SECOND VERSION (48 ITEMS-14 DIMENSIONS)***

##### **Child's Weight Concern (CWC)**

*Answers: 1 = not worried at all, 2 = a little worried, 3 = worried, 4 = quite worried, 5 = very worried*

- **CWC2:** Are you worried that your child eats too much?
- **CWC4:** Are you concerned that potential excess weight in your child during this preschool stage could be a health problem in the short/medium term?

##### **Use of Rewards (REW)**

*Answers: 1 = disagree, 2 = slightly disagree, 3 = indifferent/don't care, 4 = slightly agree, 5 = agree, 9 = NS/NC*

- **RES3:** I consider it appropriate to use some type of food as a reward when behaving well.
- **RES4:** I consider it appropriate to use food to calm my child down.
- **SBI2:** I consider it appropriate to offer rewards to my child to keep them still.

- **SV4:** I consider it appropriate to occasionally use screens to calm and/or reward my child.

### **Pressure to eat (PRE)**

*Answers: 1 = disagree, 2 = slightly disagree, 3 = indifferent/don't care, 4 = slightly agree, 5 = agree, 9 = NS/NC*

- **PRE1:** I believe my child should always finish all the food on the plate.
- **PRE2:** I try to make sure my child eats what I consider necessary.
- **PRE3:** I try to make my child eat regardless of whether they say they are not hungry.
- **PRE4:** I try to control my child's food intake so that they don't eat less than they should.
- **VQD5:** I consider it necessary for my child to eat enough, even if the diet is sometimes not varied.

### **Variety and Quality of the Diet (VQD)**

*Answers: 1 = disagree, 2 = slightly disagree, 3 = indifferent/don't care, 4 = slightly agree, 5 = agree, 9 = NS/NC*

- **RES2:** I consider it important to control my child's intake of high-calorie foods (like snacks, pizzas, and/or hamburgers).
- **VQD1:** I consider it appropriate to offer water as the only drink for my child at main meals.
- **VQD2:** I consider it appropriate to offer my child pre-cooked and/or industrially processed foods in their regular diet.
- **VQD3:** I consider it necessary to always offer salads and/or vegetables in my child's meals.
- **VQD4:** I consider it necessary for my child to eat fruits every day.
- **FME3:** I consider it necessary for family meals to always have dishes with salads and/or vegetables on the table.

### **Movement during Mealtime (MOV)**

*Answers: 1 = disagree, 2 = slightly disagree, 3 = indifferent/don't care, 4 = slightly agree, 5 = agree, 9 = NS/NC*

- **SME1:** I consider it appropriate for my child to get up or move around during meals.
- **SME3:** I consider it appropriate for my child to remain seated throughout mealtime.
- **SME5:** I consider it appropriate for my child to eat if they are not seated at the table.

### **Structured Mealtime (SMT)**



*Answers: 1 = disagree, 2 = slightly disagree, 3 = indifferent/don't care, 4 = slightly agree, 5 = agree, 9 = NS/NC*

- **SMT1:** I consider it appropriate for my child to be able to decide when he/she wants to eat.
- **SMT2:** I consider it appropriate for my child to sometimes eat between routine meals.
- **SMT3:** I am the one who should organize my child's meal schedules.

### **Family Meal Environment (FME)**

*Answers: 1 = disagree, 2 = slightly disagree, 3 = indifferent/don't care, 4 = slightly agree, 5 = agree, 9 = NS/NC*

- **FME1:** I consider it necessary for my child to eat main meals with the rest of the family.
- **FME2:** I consider it necessary for my child to eat the same food as the rest of the family.

### **Distractions during Mealtime (DIS)**

*Answers: 1 = disagree, 2 = slightly disagree, 3 = indifferent/don't care, 4 = slightly agree, 5 = agree, 9 = NS/NC*

- **SME2:** I consider it appropriate for my child to eat entertained with screens (TV, computer, mobiles, and/or tablets).
- **SME4:** I consider it appropriate for my child to eat entertained with some game.
- **SV5:** I consider it appropriate to use screens during meals.

### **Importance of Physical Activity (IPA)**

*Answers: 1 = disagree, 2 = slightly disagree, 3 = indifferent/don't care, 4 = slightly agree, 5 = agree, 9 = NS/NC*

- **SPA1:** I consider my child's physical activity as important for their development as their nutrition.
- **SPA2:** I consider my child's physical activity as important for their development as their studies.
- **SPA3:** I try to teach my child that being active is good for their health.

### **Support and Co-Participation in Physical Activity (SCP)**

*Answers: 1 = disagree, 2 = slightly disagree, 3 = indifferent/don't care, 4 = slightly agree, 5 = agree, 9 = NS/NC*

- **SPA5:** I consider it important to introduce my child to various options for physical activity and active play.
- **SPA6:** I believe my child can learn healthy habits of physical activity through my example.
- **LSA2:** I consider it necessary to provide my child with toys and/or games that encourage physical activity.

- **LSA3:** I consider it necessary to organize my child's routines so that there is frequently space for physical activity.
- **LSA4:** One of my priorities when thinking about where to live is that my child has spaces to play indoors or outdoors.
- **CPA1:** I consider it important to ask my child what they like when it comes to playing.
- **CPA3:** I believe it's necessary to have time for physical activity with my child.
- **CPA4:** I believe family habits of physical activity can influence my child's healthy lifestyle throughout their life.

### **Motivation to Physical Activity (MOT)**

*Answers: 1 = disagree, 2 = slightly disagree, 3 = indifferent/don't care, 4 = slightly agree, 5 = agree, 9 = NS/NC*

- **SPA4:** I consider it appropriate to motivate my child to engage in physical activities over other types of activities.
- **CPA2:** I consider it appropriate to play active games and/or sports with my child over other activities.

### **Limits Screen Viewing (LSV)**

*Answers: 1 = disagree, 2 = slightly disagree, 3 = indifferent/don't care, 4 = slightly agree, 5 = agree, 9 = NS/NC*

- **SV1:** I consider it appropriate to limit my child's screen viewing (TV, computer, mobiles, and/or tablets).
- **SV3:** I consider it appropriate to limit my screen time when I'm with my child/children.

### **Impact and Modification of Sleep (IMS)**

*Answers: 1 = disagree, 2 = slightly disagree, 3 = indifferent/don't care, 4 = slightly agree, 5 = agree, 9 = NS/NC*

- **IMS1:** I believe sleep routines affect other areas of my child's mental and physical development.
- **IMS4:** I believe my child's lack of sleep can encourage them to eat more during the day.
- **IMS5:** I believe family routines can influence proper sleep patterns for children.

### **Importance of Routines regarding Sleep (IRS)**

*Answers: 1 = disagree, 2 = slightly disagree, 3 = indifferent/don't care, 4 = slightly agree, 5 = agree, 9 = NS/NC*

- **IS1:** I consider it appropriate for my child to have the same sleep habits every day of the week.
- **IS3:** I consider it appropriate for my child to sleep most nights in the same place.
